# Supplementary material
Source: HighWire-hosted journal article supplement (https://bjsm.bmj.com/content/54/16/960)
Supplement: inline-supplementary-material-3 [file inline-supplementary-material-3.pdf]

## Online Supplementary File 3

Supplementary Table 1A: Assessment of risk of bias of RCT included studies through the Cochrane Risk of Bias Tool.

| First Author                                 | Selection bias             |                        | Reporting Bias      | Performance bias                    | Detection bias                | Attrition bias          | Other                | Total score              |
|----------------------------------------------|----------------------------|------------------------|---------------------|-------------------------------------|-------------------------------|-------------------------|----------------------|--------------------------|
|                                              | Random sequence generation | Allocation concealment | Selective reporting | Blinding - participants & personnel | Blinding - outcome assessment | Incomplete outcome data | Other source of bias |                          |
| <b>Non-Pharmacological Management</b>        |                            |                        |                     |                                     |                               |                         |                      |                          |
| <b>Exercise</b>                              |                            |                        |                     |                                     |                               |                         |                      |                          |
| Barger, et al.                               | Unclear                    | Low                    | Low                 | High                                | High                          | Unclear                 | Unclear              | High 2, Low 2, Unclear 3 |
| Yamanaka, et al.                             | Unclear                    | Low                    | Low                 | High                                | High                          | Unclear                 | Unclear              | High 2, Low 2, Unclear 3 |
| <b>Sleep</b>                                 |                            |                        |                     |                                     |                               |                         |                      |                          |
| Petit, et al.2014                            | Unclear                    | High                   | High                | High                                | High                          | Low                     | Unclear              | High 4, Low 1, Unclear 2 |
| Petit, et al.2018                            | Unclear                    | High                   | Low                 | High                                | High                          | Low                     | Unclear              | High 3, Low 2, Unclear 2 |
| Straub, et al.                               | High                       | High                   | High                | High                                | High                          | High                    | Unclear              | High 6, Low 0, Unclear 1 |
| <b>Light</b>                                 |                            |                        |                     |                                     |                               |                         |                      |                          |
| Thompson, et al.                             | Low                        | Low                    | Low                 | Low                                 | Unclear                       | Low                     | Unclear              | High 0, Low 5, Unclear 2 |
| <b>Nutrition (meal timing / composition)</b> |                            |                        |                     |                                     |                               |                         |                      |                          |
| Ruscitto & Ogden.                            | Low                        | Low                    | Unclear             | High                                | Unclear                       | Unclear                 | Unclear              | High 1, Low 2, Unclear 4 |
| <b>Pharmacological Management</b>            |                            |                        |                     |                                     |                               |                         |                      |                          |
| <b>Stimulants</b>                            |                            |                        |                     |                                     |                               |                         |                      |                          |
| Rosenberg, et al.                            | Low                        | Low                    | Low                 | Low                                 | Low                           | Low                     | Unclear              | High 0, Low 6, Unclear 1 |
| Lagarde, et al.                              | Unclear                    | Unclear                | Low                 | Unclear                             | High                          | Unclear                 | Unclear              | High 1, Low 1, Unclear 5 |
| Piérard, et al.                              | Unclear                    | Unclear                | Low                 | Unclear                             | High                          | Unclear                 | Unclear              | High 1, Low 1, Unclear 5 |
| Beaumont, et al.                             | Unclear                    | Unclear                | Low                 | Unclear                             | Unclear                       | Unclear                 | Unclear              | High 0, Low 1, Unclear 6 |
| <b>Melatonin Analogues</b>                   |                            |                        |                     |                                     |                               |                         |                      |                          |
| Rajaratnam, et al.                           | Low                        | Low                    | Low                 | Low                                 | Unclear                       | Low                     | Unclear              | High 0, Low 5, Unclear 2 |
| Richardson, et al.                           | Unclear                    | Low                    | Low                 | Low                                 | Unclear                       | Low                     | Unclear              | High 0, Low 4, Unclear 3 |
| Zee, et al.                                  | Unclear                    | Unclear                | Low                 | Low                                 | Unclear                       | Low                     | Unclear              | High 0, Low 3, Unclear 4 |

**Supplementary Table 1B: Assessment of methodological quality of non-RCT included studies through the Downs and Black Quality of Reporting Scale.**

| First Author                                 | Reporting | External validity | Internal validity bias | Internal validity confounding/ selection bias | Power | Total score | Interpretation:<br>QI scores: >20 = good, 11 - 20 = moderate, <11 = poor |
|----------------------------------------------|-----------|-------------------|------------------------|-----------------------------------------------|-------|-------------|--------------------------------------------------------------------------|
| <b>Exercise</b>                              |           |                   |                        |                                               |       |             |                                                                          |
| Montaruli, et al.                            | 6         | 0                 | 4                      | 0                                             | 0     | 10/28       | Poor                                                                     |
| Cardinali, et al.                            | 5         | 1                 | 3                      | 1                                             | 0     | 10/28       | Poor                                                                     |
| <b>Light</b>                                 |           |                   |                        |                                               |       |             |                                                                          |
| Cardinali, et al.                            | 5         | 1                 | 3                      | 1                                             | 0     | 10/28       | Poor                                                                     |
| <b>Nutrition (meal timing / composition)</b> |           |                   |                        |                                               |       |             |                                                                          |
| Reynolds & Montgomery.                       | 4         | 1                 | 2                      | 3                                             | 0     | 10/28       | Poor                                                                     |
| <b>Pharmacological Management</b>            |           |                   |                        |                                               |       |             |                                                                          |
| <b>Melatonin</b>                             |           |                   |                        |                                               |       |             |                                                                          |
| Cardinali, et al.                            | 5         | 1                 | 3                      | 1                                             | 0     | 10/28       | Poor                                                                     |
| Manfredini, et al.                           | 5         | 1                 | 2                      | 1                                             | 0     | 9/28        | Poor                                                                     |
| <b>Sedatives</b>                             |           |                   |                        |                                               |       |             |                                                                          |
| Reilly, et al.                               | 3         | 1                 | 4                      | 1                                             | 0     | 9/28        | Poor                                                                     |
| <b>Melatonin Analogues</b>                   |           |                   |                        |                                               |       |             |                                                                          |
| Nickelsen, et al.                            | 9         | 1                 | 5                      | 4                                             | 0     | 19/28       | Moderate                                                                 |

**Note:** Studies were assessed for quality by means of the Downs and Black checklist. This scoring system is based on a checklist of 27 questions (total score of 28, Q5 = 2 points), comprising of four categories of evaluation: quality reporting (10 questions), external validity (3 questions), internal validity - bias and confounding (13 questions) and statistical power (1 question). Quality Index (QI) score used: >20 good, 11 - 20 moderate, and <11 poor.
